# Supplementary material for: Digital Gene-Expression Profiling Analysis of the Cholesterol-Lowering Effects of Alfalfa Saponin Extract on Laying Hens
Source: PLoS One. 2014 Jun 2;9(6):e98578. doi: 10.1371/journal.pone.0098578 (PMC4041749; doi:10.1371/journal.pone.0098578)
Supplement: Table S3 — KEGG pathway classification of differentially expressed genes in the liver and ovary. (XLSX) [file pone.0098578.s009.xlsx]

## Sheet: Liver
##The most enriched pathway or disease terms:
##Statistic method: hypergeometric test
##FDR correction method: Benjamini and Hochberg (1995)
#Term	Database	Id	Sample number	Background number	P-Value	Genes	KO	Entrez_ID	Ensembl_ID	KO_name	Hyperlink
Fatty acid metabolism	KEGG PATHWAY	gga00071	9	33	3.20638e-08	ENSGALG00000012809|ENSGALG00000016555|ENSGALG00000002159|ENSGALG00000005860|ENSGALG00000007077|ENSGALG00000003495|ENSGALG00000006680|ENSGALG00000012250|ENSGALG00000004725	gga:420878|gga:421995|gga:417366|gga:770094|gga:423118|gga:424405|gga:424877|gga:771920|gga:416880|	| | | | | | | | |	420878|421995|417366|770094|423118|424405|424877|771920|416880|	PECI|HADHB|ACOX1|ACAA1|CPT1A, CPT1|ALDH9A1|EHHADH|ADH1B, ADH-1, ADH1C|ALDH2|	http://www.genome.jp/kegg-bin/show_pathway?gga00071
PPAR signaling pathway	KEGG PATHWAY	gga03320	9	57	4.66789e-06	ENSGALG00000007114|ENSGALG00000002159|ENSGALG00000005860|ENSGALG00000008202|ENSGALG00000005739|ENSGALG00000007077|ENSGALG00000000620|ENSGALG00000007636|ENSGALG00000006680	gga:396536|gga:417366|gga:770094|gga:395221|gga:395706|gga:423118|gga:419557|gga:396458|gga:424877|	| | | | | | | | |	396536|417366|770094|395221|395706|423118|419557|396458|424877|	APOA1|ACOX1|ACAA1|NR1H3, LXR, LXRA|SCD|CPT1A, CPT1|FABP3, FABP, H-FABP|PCK1, PEPCK|EHHADH|	http://www.genome.jp/kegg-bin/show_pathway?gga03320
Glycolysis / Gluconeogenesis	KEGG PATHWAY	gga00010	8	48	1.0573e-05	ENSGALG00000011016|ENSGALG00000006300|ENSGALG00000007936|ENSGALG00000003495|ENSGALG00000007636|ENSGALG00000014442|ENSGALG00000012250|ENSGALG00000004725	gga:424691|gga:396221|gga:395833|gga:424405|gga:396458|gga:374193|gga:771920|gga:416880|	| | | | | | | |	424691|396221|395833|424405|396458|374193|771920|416880|	PGM1|LDHA|PGK1, PGK|ALDH9A1|PCK1, PEPCK|GAPDH, KNC-NDS6|ADH1B, ADH-1, ADH1C|ALDH2|	http://www.genome.jp/kegg-bin/show_pathway?gga00010
Propanoate metabolism	KEGG PATHWAY	gga00640	6	27	2.51583e-05	ENSGALG00000006300|ENSGALG00000005043|ENSGALG00000005439|ENSGALG00000003495|ENSGALG00000006680|ENSGALG00000004725	gga:396221|gga:396504|gga:430557|gga:424405|gga:424877|gga:416880|	| | | | | |	396221|396504|430557|424405|424877|416880|	LDHA|ACACA, ACAC|ACACB|ALDH9A1|EHHADH|ALDH2|	http://www.genome.jp/kegg-bin/show_pathway?gga00640
Valine, leucine and isoleucine degradation	KEGG PATHWAY	gga00280	7	40	2.752e-05	ENSGALG00000016555|ENSGALG00000005860|ENSGALG00000003495|ENSGALG00000006680|ENSGALG00000014862|ENSGALG00000004725|ENSGALG00000004057	gga:421995|gga:770094|gga:424405|gga:424877|gga:396379|gga:416880|gga:396316|	| | | | | | |	421995|770094|424405|424877|396379|416880|396316|	HADHB|ACAA1|ALDH9A1|EHHADH|HMGCS1|ALDH2|HMGCL, HL|	http://www.genome.jp/kegg-bin/show_pathway?gga00280
Pyruvate metabolism	KEGG PATHWAY	gga00620	6	37	0.000163554	ENSGALG00000006300|ENSGALG00000005043|ENSGALG00000005439|ENSGALG00000003495|ENSGALG00000007636|ENSGALG00000004725	gga:396221|gga:396504|gga:430557|gga:424405|gga:396458|gga:416880|	| | | | | |	396221|396504|430557|424405|396458|416880|	LDHA|ACACA, ACAC|ACACB|ALDH9A1|PCK1, PEPCK|ALDH2|	http://www.genome.jp/kegg-bin/show_pathway?gga00620
Fatty acid biosynthesis	KEGG PATHWAY	gga00061	3	6	0.00021872	ENSGALG00000002747|ENSGALG00000005043|ENSGALG00000005439	gga:396061|gga:396504|gga:430557|	| | |	396061|396504|430557|	FASN|ACACA, ACAC|ACACB|	http://www.genome.jp/kegg-bin/show_pathway?gga00061
Protein processing in endoplasmic reticulum	KEGG PATHWAY	gga04141	11	140	0.000328879	ENSGALG00000008348|ENSGALG00000011351|ENSGALG00000004765|ENSGALG00000011715|ENSGALG00000023066|ENSGALG00000007233|ENSGALG00000001000|ENSGALG00000017077|ENSGALG00000012726|ENSGALG00000006512|ENSGALG00000005796	gga:373899|gga:423463|gga:416882|gga:423504|gga:427376|gga:374091|gga:396487|gga:418917|gga:374163|gga:395853|gga:416918|	| | | | | | | | | | |	373899|423463|416882|423504|427376|374091|396487|418917|374163|395853|416918|	PDIA3, ERp57, GRP58|HSP90AA1|ERP29, C12orf8|HSPA2, HSP70|DNAJA1|P4HB, PDI|HSPA5, GRP78|HSPH1|HSP90B1, hsp108|HSPA8, HSC70|XBP1|	http://www.genome.jp/kegg-bin/show_pathway?gga04141
Biosynthesis of unsaturated fatty acids	KEGG PATHWAY	gga01040	4	19	0.000762472	ENSGALG00000002159|ENSGALG00000005739|ENSGALG00000012131|ENSGALG00000005860	gga:417366|gga:395706|gga:428772|gga:770094|	| | | |	417366|395706|428772|770094|	ACOX1|SCD|ELOVL6|ACAA1|	http://www.genome.jp/kegg-bin/show_pathway?gga01040
Peroxisome	KEGG PATHWAY	gga04146	7	71	0.00108461	ENSGALG00000012809|ENSGALG00000005860|ENSGALG00000008845|ENSGALG00000015844|ENSGALG00000002159|ENSGALG00000006680|ENSGALG00000004057	gga:420878|gga:770094|gga:416728|gga:395938|gga:417366|gga:424877|gga:396316|	| | | | | | |	420878|770094|416728|395938|417366|424877|396316|	PECI|ACAA1|HAO1|SOD1|ACOX1|EHHADH|HMGCL, HL|	http://www.genome.jp/kegg-bin/show_pathway?gga04146
Tryptophan metabolism	KEGG PATHWAY	gga00380	4	39	0.0113688	ENSGALG00000004725|ENSGALG00000003495|ENSGALG00000009370|ENSGALG00000006680	gga:416880|gga:424405|gga:422409|gga:424877|	| | | |	416880|424405|422409|424877|	ALDH2|ALDH9A1|TDO2|EHHADH|	http://www.genome.jp/kegg-bin/show_pathway?gga00380
Synthesis and degradation of ketone bodies	KEGG PATHWAY	gga00072	2	8	0.0131028	ENSGALG00000014862|ENSGALG00000004057	gga:396379|gga:396316|	| |	396379|396316|	HMGCS1|HMGCL, HL|	http://www.genome.jp/kegg-bin/show_pathway?gga00072
Metabolic pathways	KEGG PATHWAY	gga01100	33	987	0.014146	ENSGALG00000006300|ENSGALG00000005439|ENSGALG00000005860|ENSGALG00000012250|ENSGALG00000009370|ENSGALG00000006680|ENSGALG00000014442|ENSGALG00000016555|ENSGALG00000004518|ENSGALG00000002358|ENSGALG00000003948|ENSGALG00000007936|ENSGALG00000005227|ENSGALG00000002747|ENSGALG00000003570|ENSGALG00000008855|ENSGALG00000014862|ENSGALG00000011016|ENSGALG00000002162|ENSGALG00000008845|ENSGALG00000009365|…	gga:396221|gga:430557|gga:770094|gga:771920|gga:422409|gga:424877|gga:374193|gga:421995|gga:416371|gga:427391|gga:552895|gga:395833|gga:426629|gga:396061|gga:396091|gga:373900|gga:396379|gga:424691|gga:373916|gga:416728|gga:420548|gga:396504|gga:424405|gga:396458|gga:396540|gga:395373|gga:423792|gga:422423|gga:423678|gga:417366|gga:423374|gga:416880|gga:396316|	| | | | | | | | | | | | | | | | | | | | | | | | | | | | | | | | |	396221|430557|770094|771920|422409|424877|374193|421995|416371|427391|552895|395833|426629|396061|396091|373900|396379|424691|373916|416728|420548|396504|424405|396458|396540|395373|423792|422423|423678|417366|423374|416880|396316|	LDHA|ACACB|ACAA1|ADH1B, ADH-1, ADH1C|TDO2|EHHADH|GAPDH, KNC-NDS6|HADHB|BHMT|CDO1|ALAS1, ALASN|PGK1, PGK|DAK|FASN|ATIC, PURH|UGP2|HMGCS1|PGM1|ACO1, IREB1, IREBP|HAO1|CYP51A1, CYP51|ACACA, ACAC|ALDH9A1|PCK1, PEPCK|ADSL, purB|ACLY, ACL|PANK1|SC4MOL, MSMO1|PAPSS2|ACOX1|GSTZ1|ALDH2|HMGCL, HL|	http://www.genome.jp/kegg-bin/show_pathway?gga01100
Butanoate metabolism	KEGG PATHWAY	gga00650	3	24	0.0163884	ENSGALG00000014862|ENSGALG00000006680|ENSGALG00000004057	gga:396379|gga:424877|gga:396316|	| | |	396379|424877|396316|	HMGCS1|EHHADH|HMGCL, HL|	http://www.genome.jp/kegg-bin/show_pathway?gga00650
Amino sugar and nucleotide sugar metabolism	KEGG PATHWAY	gga00520	4	44	0.0171938	ENSGALG00000023754|ENSGALG00000023760|ENSGALG00000011016|ENSGALG00000008855	gga:419931|gga:395072|gga:424691|gga:373900|	| | | |	419931|395072|424691|373900|	CHIA|CHIA, CBPCH04|PGM1|UGP2|	http://www.genome.jp/kegg-bin/show_pathway?gga00520
beta-Alanine metabolism	KEGG PATHWAY	gga00410	3	25	0.0183181	ENSGALG00000004725|ENSGALG00000003495|ENSGALG00000006680	gga:416880|gga:424405|gga:424877|	| | |	416880|424405|424877|	ALDH2|ALDH9A1|EHHADH|	http://www.genome.jp/kegg-bin/show_pathway?gga00410
Ascorbate and aldarate metabolism	KEGG PATHWAY	gga00053	2	10	0.0204394	ENSGALG00000003495|ENSGALG00000004725	gga:424405|gga:416880|	| |	424405|416880|	ALDH9A1|ALDH2|	http://www.genome.jp/kegg-bin/show_pathway?gga00053
Citrate cycle (TCA cycle)	KEGG PATHWAY	gga00020	3	29	0.0272466	ENSGALG00000003475|ENSGALG00000002162|ENSGALG00000007636	gga:395373|gga:373916|gga:396458|	| | |	395373|373916|396458|	ACLY, ACL|ACO1, IREB1, IREBP|PCK1, PEPCK|	http://www.genome.jp/kegg-bin/show_pathway?gga00020
Cysteine and methionine metabolism	KEGG PATHWAY	gga00270	3	29	0.0272466	ENSGALG00000002358|ENSGALG00000006300|ENSGALG00000004518	gga:427391|gga:396221|gga:416371|	| | |	427391|396221|416371|	CDO1|LDHA|BHMT|	http://www.genome.jp/kegg-bin/show_pathway?gga00270
Steroid biosynthesis	KEGG PATHWAY	gga00100	2	15	0.044288	ENSGALG00000009365|ENSGALG00000009560	gga:420548|gga:422423|	| |	420548|422423|	CYP51A1, CYP51|SC4MOL, MSMO1|	http://www.genome.jp/kegg-bin/show_pathway?gga00100
Pentose and glucuronate interconversions	KEGG PATHWAY	gga00040	2	17	0.0557006	ENSGALG00000008855|ENSGALG00000004725	gga:373900|gga:416880|	| |	373900|416880|	UGP2|ALDH2|	http://www.genome.jp/kegg-bin/show_pathway?gga00040
Lysine degradation	KEGG PATHWAY	gga00310	3	41	0.0653607	ENSGALG00000004725|ENSGALG00000003495|ENSGALG00000006680	gga:416880|gga:424405|gga:424877|	| | |	416880|424405|424877|	ALDH2|ALDH9A1|EHHADH|	http://www.genome.jp/kegg-bin/show_pathway?gga00310
Fatty acid elongation	KEGG PATHWAY	gga00062	2	19	0.0680128	ENSGALG00000016555|ENSGALG00000012131	gga:421995|gga:428772|	| |	421995|428772|	HADHB|ELOVL6|	http://www.genome.jp/kegg-bin/show_pathway?gga00062
Glycerolipid metabolism	KEGG PATHWAY	gga00561	3	47	0.0902548	ENSGALG00000004725|ENSGALG00000003495|ENSGALG00000005227	gga:416880|gga:424405|gga:426629|	| | |	416880|424405|426629|	ALDH2|ALDH9A1|DAK|	http://www.genome.jp/kegg-bin/show_pathway?gga00561
Glyoxylate and dicarboxylate metabolism	KEGG PATHWAY	gga00630	2	23	0.0949326	ENSGALG00000002162|ENSGALG00000008845	gga:373916|gga:416728|	| |	373916|416728|	ACO1, IREB1, IREBP|HAO1|	http://www.genome.jp/kegg-bin/show_pathway?gga00630
Histidine metabolism	KEGG PATHWAY	gga00340	2	23	0.0949326	ENSGALG00000003495|ENSGALG00000004725	gga:424405|gga:416880|	| |	424405|416880|	ALDH9A1|ALDH2|	http://www.genome.jp/kegg-bin/show_pathway?gga00340
alpha-Linolenic acid metabolism	KEGG PATHWAY	gga00592	2	25	0.109356	ENSGALG00000002159|ENSGALG00000005860	gga:417366|gga:770094|	| |	417366|770094|	ACOX1|ACAA1|	http://www.genome.jp/kegg-bin/show_pathway?gga00592
Galactose metabolism	KEGG PATHWAY	gga00052	2	28	0.131962	ENSGALG00000011016|ENSGALG00000008855	gga:424691|gga:373900|	| |	424691|373900|	PGM1|UGP2|	http://www.genome.jp/kegg-bin/show_pathway?gga00052
Drug metabolism	KEGG PATHWAY	gga00982	2	32	0.163532	ENSGALG00000012250|ENSGALG00000016328	gga:771920|gga:414895|	| |	771920|414895|	ADH1B, ADH-1, ADH1C|GSTA|	http://www.genome.jp/kegg-bin/show_pathway?gga00982
Taurine and hypotaurine metabolism	KEGG PATHWAY	gga00430	1	8	0.167761	ENSGALG00000002358	gga:427391|	|	427391|	CDO1|	http://www.genome.jp/kegg-bin/show_pathway?gga00430
Tyrosine metabolism	KEGG PATHWAY	gga00350	2	33	0.171624	ENSGALG00000010432|ENSGALG00000012250	gga:423374|gga:771920|	| |	423374|771920|	GSTZ1|ADH1B, ADH-1, ADH1C|	http://www.genome.jp/kegg-bin/show_pathway?gga00350
Starch and sucrose metabolism	KEGG PATHWAY	gga00500	2	33	0.171624	ENSGALG00000011016|ENSGALG00000008855	gga:424691|gga:373900|	| |	424691|373900|	PGM1|UGP2|	http://www.genome.jp/kegg-bin/show_pathway?gga00500
Glycine, serine and threonine metabolism	KEGG PATHWAY	gga00260	2	34	0.179781	ENSGALG00000003948|ENSGALG00000004518	gga:552895|gga:416371|	| |	552895|416371|	ALAS1, ALASN|BHMT|	http://www.genome.jp/kegg-bin/show_pathway?gga00260
Metabolism of xenobiotics by cytochrome P450	KEGG PATHWAY	gga00980	2	35	0.187996	ENSGALG00000012250|ENSGALG00000016328	gga:771920|gga:414895|	| |	771920|414895|	ADH1B, ADH-1, ADH1C|GSTA|	http://www.genome.jp/kegg-bin/show_pathway?gga00980
Sulfur metabolism	KEGG PATHWAY	gga00920	1	10	0.205125	ENSGALG00000003689	gga:423678|	|	423678|	PAPSS2|	http://www.genome.jp/kegg-bin/show_pathway?gga00920
NOD-like receptor signaling pathway	KEGG PATHWAY	gga04621	2	41	0.238136	ENSGALG00000011351|ENSGALG00000012726	gga:423463|gga:374163|	| |	423463|374163|	HSP90AA1|HSP90B1, hsp108|	http://www.genome.jp/kegg-bin/show_pathway?gga04621
Insulin signaling pathway	KEGG PATHWAY	gga04910	4	114	0.259286	ENSGALG00000002747|ENSGALG00000005043|ENSGALG00000005439|ENSGALG00000007636	gga:396061|gga:396504|gga:430557|gga:396458|	| | | |	396061|396504|430557|396458|	FASN|ACACA, ACAC|ACACB|PCK1, PEPCK|	http://www.genome.jp/kegg-bin/show_pathway?gga04910
Pantothenate and CoA biosynthesis	KEGG PATHWAY	gga00770	1	14	0.274918	ENSGALG00000006431	gga:423792|	|	423792|	PANK1|	http://www.genome.jp/kegg-bin/show_pathway?gga00770
Arginine and proline metabolism	KEGG PATHWAY	gga00330	2	46	0.280415	ENSGALG00000003495|ENSGALG00000004725	gga:424405|gga:416880|	| |	424405|416880|	ALDH9A1|ALDH2|	http://www.genome.jp/kegg-bin/show_pathway?gga00330
Selenocompound metabolism	KEGG PATHWAY	gga00450	1	16	0.307493	ENSGALG00000003689	gga:423678|	|	423678|	PAPSS2|	http://www.genome.jp/kegg-bin/show_pathway?gga00450
One carbon pool by folate	KEGG PATHWAY	gga00670	1	17	0.32323	ENSGALG00000003570	gga:396091|	|	396091|	ATIC, PURH|	http://www.genome.jp/kegg-bin/show_pathway?gga00670
Terpenoid backbone biosynthesis	KEGG PATHWAY	gga00900	1	19	0.353645	ENSGALG00000014862	gga:396379|	|	396379|	HMGCS1|	http://www.genome.jp/kegg-bin/show_pathway?gga00900
Purine metabolism	KEGG PATHWAY	gga00230	4	137	0.3773	ENSGALG00000011016|ENSGALG00000012034|ENSGALG00000003570|ENSGALG00000003689	gga:424691|gga:396540|gga:396091|gga:423678|	| | | |	424691|396540|396091|423678|	PGM1|ADSL, purB|ATIC, PURH|PAPSS2|	http://www.genome.jp/kegg-bin/show_pathway?gga00230
Pentose phosphate pathway	KEGG PATHWAY	gga00030	1	21	0.382698	ENSGALG00000011016	gga:424691|	|	424691|	PGM1|	http://www.genome.jp/kegg-bin/show_pathway?gga00030
Protein export	KEGG PATHWAY	gga03060	1	21	0.382698	ENSGALG00000001000	gga:396487|	|	396487|	HSPA5, GRP78|	http://www.genome.jp/kegg-bin/show_pathway?gga03060
Adipocytokine signaling pathway	KEGG PATHWAY	gga04920	2	60	0.396489	ENSGALG00000007077|ENSGALG00000007636	gga:423118|gga:396458|	| |	423118|396458|	CPT1A, CPT1|PCK1, PEPCK|	http://www.genome.jp/kegg-bin/show_pathway?gga04920
Porphyrin and chlorophyll metabolism	KEGG PATHWAY	gga00860	1	23	0.410453	ENSGALG00000003948	gga:552895|	|	552895|	ALAS1, ALASN|	http://www.genome.jp/kegg-bin/show_pathway?gga00860
Alanine, aspartate and glutamate metabolism	KEGG PATHWAY	gga00250	1	28	0.474525	ENSGALG00000012034	gga:396540|	|	396540|	ADSL, purB|	http://www.genome.jp/kegg-bin/show_pathway?gga00250
Retinol metabolism	KEGG PATHWAY	gga00830	1	29	0.486482	ENSGALG00000012250	gga:771920|	|	771920|	ADH1B, ADH-1, ADH1C|	http://www.genome.jp/kegg-bin/show_pathway?gga00830
Intestinal immune network for IgA production	KEGG PATHWAY	gga04672	1	31	0.50959	ENSGALG00000000919	gga:419848|	|	419848|	PIGR|	http://www.genome.jp/kegg-bin/show_pathway?gga04672
Glutathione metabolism	KEGG PATHWAY	gga00480	1	37	0.572888	ENSGALG00000016328	gga:414895|	|	414895|	GSTA|	http://www.genome.jp/kegg-bin/show_pathway?gga00480
Endocytosis	KEGG PATHWAY	gga04144	4	182	0.595844	ENSGALG00000010293|ENSGALG00000006512|ENSGALG00000011715|ENSGALG00000002683	gga:396449|gga:395853|gga:423504|gga:395915|	| | | |	396449|395853|423504|395915|	Rd|HSPA8, HSC70|HSPA2, HSP70|RAB11FIP3, MNDPK|	http://www.genome.jp/kegg-bin/show_pathway?gga04144
Spliceosome	KEGG PATHWAY	gga03040	2	104	0.687787	ENSGALG00000006512|ENSGALG00000011715	gga:395853|gga:423504|	| |	395853|423504|	HSPA8, HSC70|HSPA2, HSP70|	http://www.genome.jp/kegg-bin/show_pathway?gga03040
RIG-I-like receptor signaling pathway	KEGG PATHWAY	gga04622	1	54	0.711418	ENSGALG00000005227	gga:426629|	|	426629|	DAK|	http://www.genome.jp/kegg-bin/show_pathway?gga04622
Cardiac muscle contraction	KEGG PATHWAY	gga04260	1	56	0.72444	ENSGALG00000015003	gga:396530|	|	396530|	ATP1A1|	http://www.genome.jp/kegg-bin/show_pathway?gga04260
Phagosome	KEGG PATHWAY	gga04145	2	122	0.768929	ENSGALG00000012119|ENSGALG00000002507	gga:395488|gga:374267|	| |	395488|374267|	MARCO|MBL2, MBL1, cMBl, collectin|	http://www.genome.jp/kegg-bin/show_pathway?gga04145
Influenza A	KEGG PATHWAY	gga05164	2	128	0.791605	ENSGALG00000006512|ENSGALG00000011715	gga:395853|gga:423504|	| |	395853|423504|	HSPA8, HSC70|HSPA2, HSP70|	http://www.genome.jp/kegg-bin/show_pathway?gga05164
Progesterone-mediated oocyte maturation	KEGG PATHWAY	gga04914	1	72	0.809619	ENSGALG00000011351	gga:423463|	|	423463|	HSP90AA1|	http://www.genome.jp/kegg-bin/show_pathway?gga04914
ECM-receptor interaction	KEGG PATHWAY	gga04512	1	74	0.818228	ENSGALG00000003589	gga:395935|	|	395935|	VTN|	http://www.genome.jp/kegg-bin/show_pathway?gga04512
Wnt signaling pathway	KEGG PATHWAY	gga04310	1	123	0.941686	ENSGALG00000006080	gga:422234|	|	422234|	GPC4|	http://www.genome.jp/kegg-bin/show_pathway?gga04310
MAPK signaling pathway	KEGG PATHWAY	gga04010	2	212	0.956045	ENSGALG00000006512|ENSGALG00000011715	gga:395853|gga:423504|	| |	395853|423504|	HSPA8, HSC70|HSPA2, HSP70|	http://www.genome.jp/kegg-bin/show_pathway?gga04010
Herpes simplex infection	KEGG PATHWAY	gga05168	1	141	0.961656	ENSGALG00000004594	gga:414741|	|	414741|	CD74, CD76, II|	http://www.genome.jp/kegg-bin/show_pathway?gga05168
Focal adhesion	KEGG PATHWAY	gga04510	1	182	0.985292	ENSGALG00000003589	gga:395935|	|	395935|	VTN|	http://www.genome.jp/kegg-bin/show_pathway?gga04510
--------------------
#Term	Database	Id	Sample number	Background number	P-Value	Genes	KO	Entrez_ID	Ensembl_ID	KO_name	Hyperlink
--------------------

## Sheet: Ovary
##The most enriched pathway or disease terms:
##Statistic method: hypergeometric test
##FDR correction method: Benjamini and Hochberg (1995)
#Term	Database	Id	Sample number	Background number	P-Value	Genes	KO	Entrez_ID	Ensembl_ID	KO_name	Hyperlink
ECM-receptor interaction	KEGG PATHWAY	gga04512	9	74	3.0325e-08	ENSGALG00000010926|ENSGALG00000006126|ENSGALG00000011200|ENSGALG00000002552|ENSGALG00000009641|ENSGALG00000011778|ENSGALG00000005974|ENSGALG00000002655|ENSGALG00000003578	gga:395210|gga:396292|gga:414837|gga:396340|gga:396243|gga:395142|gga:396000|gga:396420|gga:396133|	| | | | | | | | |	395210|396292|414837|396340|396243|395142|396000|396420|396133|	SPP1|COL6A2|THBS2|COL3A1|COL1A2|ITGB5|COL6A1|ITGAV|FN1, FN|	http://www.genome.jp/kegg-bin/show_pathway?gga04512
Lysosome	KEGG PATHWAY	gga04142	8	101	5.11232e-06	ENSGALG00000000562|ENSGALG00000010811|ENSGALG00000011621|ENSGALG00000006613|ENSGALG00000004769|ENSGALG00000000775|ENSGALG00000016666|ENSGALG00000015030	gga:419552|gga:423418|gga:395817|gga:396090|gga:395602|gga:425657|gga:396329|gga:421076|	| | | | | | | |	419552|423418|395817|396090|395602|425657|396329|421076|	LAPTM5|LGMN|IGF2R|CTSD|PSAP|CTSS|CTSB|NPC1|	http://www.genome.jp/kegg-bin/show_pathway?gga04142
Focal adhesion	KEGG PATHWAY	gga04510	9	182	5.83859e-05	ENSGALG00000010926|ENSGALG00000006126|ENSGALG00000011200|ENSGALG00000002552|ENSGALG00000009641|ENSGALG00000011778|ENSGALG00000005974|ENSGALG00000002655|ENSGALG00000003578	gga:395210|gga:396292|gga:414837|gga:396340|gga:396243|gga:395142|gga:396000|gga:396420|gga:396133|	| | | | | | | | |	395210|396292|414837|396340|396243|395142|396000|396420|396133|	SPP1|COL6A2|THBS2|COL3A1|COL1A2|ITGB5|COL6A1|ITGAV|FN1, FN|	http://www.genome.jp/kegg-bin/show_pathway?gga04510
Phagosome	KEGG PATHWAY	gga04145	5	122	0.00627258	ENSGALG00000011200|ENSGALG00000011778|ENSGALG00000000775|ENSGALG00000002655|ENSGALG00000024372	gga:414837|gga:395142|gga:425657|gga:396420|gga:425389|	| | | | |	414837|395142|425657|396420|425389|	THBS2|ITGB5|CTSS|ITGAV|BF2, B-F, B-F-S01, B-F-S02, B-F-S03, B-F-S09, B-F-S11, B-F-S12, B-F-S13, B-F-S14, |	http://www.genome.jp/kegg-bin/show_pathway?gga04145
Porphyrin and chlorophyll metabolism	KEGG PATHWAY	gga00860	2	23	0.020262	ENSGALG00000012550|ENSGALG00000007220	gga:396287|gga:395970|	| |	396287|395970|	HMOX1, HO-1|FTH1, FTH|	http://www.genome.jp/kegg-bin/show_pathway?gga00860
Steroid hormone biosynthesis	KEGG PATHWAY	gga00140	2	32	0.037579	ENSGALG00000008121|ENSGALG00000013294	gga:425056|gga:414854|	| |	425056|414854|	CYP17A1, P450-C17, P450c17|CYP19A1|	http://www.genome.jp/kegg-bin/show_pathway?gga00140
Protein processing in endoplasmic reticulum	KEGG PATHWAY	gga04141	4	140	0.045543	ENSGALG00000011351|ENSGALG00000006512|ENSGALG00000011715|ENSGALG00000001000	gga:423463|gga:395853|gga:423504|gga:396487|	| | | |	423463|395853|423504|396487|	HSP90AA1|HSPA8, HSC70|HSPA2, HSP70|HSPA5, GRP78|	http://www.genome.jp/kegg-bin/show_pathway?gga04141
Cell adhesion molecules (CAMs)	KEGG PATHWAY	gga04514	3	101	0.0730347	ENSGALG00000015624|ENSGALG00000002655|ENSGALG00000024372	gga:395565|gga:396420|gga:425389|	| | |	395565|396420|425389|	VCAN, PG-M|ITGAV|BF2, B-F, B-F-S01, B-F-S02, B-F-S03, B-F-S09, B-F-S11, B-F-S12, B-F-S13, B-F-S14, |	http://www.genome.jp/kegg-bin/show_pathway?gga04514
Glycolysis / Gluconeogenesis	KEGG PATHWAY	gga00010	2	48	0.0775063	ENSGALG00000014442|ENSGALG00000006300	gga:374193|gga:396221|	| |	374193|396221|	GAPDH, KNC-NDS6|LDHA|	http://www.genome.jp/kegg-bin/show_pathway?gga00010
Spliceosome	KEGG PATHWAY	gga03040	3	104	0.0782219	ENSGALG00000006512|ENSGALG00000000827|ENSGALG00000011715	gga:395853|gga:420077|gga:423504|	| | |	395853|420077|423504|	HSPA8, HSC70|SF3A2, SAP62, SF3a66|HSPA2, HSP70|	http://www.genome.jp/kegg-bin/show_pathway?gga03040
Protein export	KEGG PATHWAY	gga03060	1	21	0.183733	ENSGALG00000001000	gga:396487|	|	396487|	HSPA5, GRP78|	http://www.genome.jp/kegg-bin/show_pathway?gga03060
Propanoate metabolism	KEGG PATHWAY	gga00640	1	27	0.229801	ENSGALG00000006300	gga:396221|	|	396221|	LDHA|	http://www.genome.jp/kegg-bin/show_pathway?gga00640
Regulation of actin cytoskeleton	KEGG PATHWAY	gga04810	3	173	0.231585	ENSGALG00000002655|ENSGALG00000003578|ENSGALG00000011778	gga:396420|gga:396133|gga:395142|	| | |	396420|396133|395142|	ITGAV|FN1, FN|ITGB5|	http://www.genome.jp/kegg-bin/show_pathway?gga04810
Cysteine and methionine metabolism	KEGG PATHWAY	gga00270	1	29	0.244578	ENSGALG00000006300	gga:396221|	|	396221|	LDHA|	http://www.genome.jp/kegg-bin/show_pathway?gga00270
Retinol metabolism	KEGG PATHWAY	gga00830	1	29	0.244578	ENSGALG00000015640	gga:420183|	|	420183|	RDH10|	http://www.genome.jp/kegg-bin/show_pathway?gga00830
Endocytosis	KEGG PATHWAY	gga04144	3	182	0.254715	ENSGALG00000006512|ENSGALG00000011715|ENSGALG00000024372	gga:395853|gga:423504|gga:425389|	| | |	395853|423504|425389|	HSPA8, HSC70|HSPA2, HSP70|BF2, B-F, B-F-S01, B-F-S02, B-F-S03, B-F-S09, B-F-S11, B-F-S12, B-F-S13, B-F-S14, |	http://www.genome.jp/kegg-bin/show_pathway?gga04144
Pyruvate metabolism	KEGG PATHWAY	gga00620	1	37	0.300937	ENSGALG00000006300	gga:396221|	|	396221|	LDHA|	http://www.genome.jp/kegg-bin/show_pathway?gga00620
Hepatitis B	KEGG PATHWAY	gga05161	2	120	0.321015	ENSGALG00000006992|ENSGALG00000016231	gga:395387|gga:418567|	| |	395387|418567|	MMP9|DDX3X|	http://www.genome.jp/kegg-bin/show_pathway?gga05161
NOD-like receptor signaling pathway	KEGG PATHWAY	gga04621	1	41	0.327537	ENSGALG00000011351	gga:423463|	|	423463|	HSP90AA1|	http://www.genome.jp/kegg-bin/show_pathway?gga04621
Influenza A	KEGG PATHWAY	gga05164	2	128	0.349186	ENSGALG00000006512|ENSGALG00000011715	gga:395853|gga:423504|	| |	395853|423504|	HSPA8, HSC70|HSPA2, HSP70|	http://www.genome.jp/kegg-bin/show_pathway?gga05164
Arachidonic acid metabolism	KEGG PATHWAY	gga00590	1	45	0.353136	ENSGALG00000005069	gga:396451|	|	396451|	PTGS2, CEF147, PGHS2, PHSII|	http://www.genome.jp/kegg-bin/show_pathway?gga00590
Herpes simplex infection	KEGG PATHWAY	gga05168	2	141	0.394098	ENSGALG00000003547|ENSGALG00000024372	gga:427437|gga:425389|	| |	427437|425389|	SKP2|BF2, B-F, B-F-S01, B-F-S02, B-F-S03, B-F-S09, B-F-S11, B-F-S12, B-F-S13, B-F-S14, |	http://www.genome.jp/kegg-bin/show_pathway?gga05168
RIG-I-like receptor signaling pathway	KEGG PATHWAY	gga04622	1	54	0.407265	ENSGALG00000016231	gga:418567|	|	418567|	DDX3X|	http://www.genome.jp/kegg-bin/show_pathway?gga04622
VEGF signaling pathway	KEGG PATHWAY	gga04370	1	56	0.418672	ENSGALG00000005069	gga:396451|	|	396451|	PTGS2, CEF147, PGHS2, PHSII|	http://www.genome.jp/kegg-bin/show_pathway?gga04370
PPAR signaling pathway	KEGG PATHWAY	gga03320	1	57	0.424294	ENSGALG00000015767	gga:374165|	|	374165|	FABP4, A-FABP, AFABP, FABP|	http://www.genome.jp/kegg-bin/show_pathway?gga03320
TGF-beta signaling pathway	KEGG PATHWAY	gga04350	1	70	0.492666	ENSGALG00000011200	gga:414837|	|	414837|	THBS2|	http://www.genome.jp/kegg-bin/show_pathway?gga04350
Progesterone-mediated oocyte maturation	KEGG PATHWAY	gga04914	1	72	0.502447	ENSGALG00000011351	gga:423463|	|	423463|	HSP90AA1|	http://www.genome.jp/kegg-bin/show_pathway?gga04914
Toll-like receptor signaling pathway	KEGG PATHWAY	gga04620	1	83	0.553002	ENSGALG00000010926	gga:395210|	|	395210|	SPP1|	http://www.genome.jp/kegg-bin/show_pathway?gga04620
MAPK signaling pathway	KEGG PATHWAY	gga04010	2	212	0.60862	ENSGALG00000006512|ENSGALG00000011715	gga:395853|gga:423504|	| |	395853|423504|	HSPA8, HSC70|HSPA2, HSP70|	http://www.genome.jp/kegg-bin/show_pathway?gga04010
Vascular smooth muscle contraction	KEGG PATHWAY	gga04270	1	106	0.642875	ENSGALG00000006343	gga:423787|	|	423787|	ACTA2, asma|	http://www.genome.jp/kegg-bin/show_pathway?gga04270
Cell cycle	KEGG PATHWAY	gga04110	1	108	0.649788	ENSGALG00000003547	gga:427437|	|	427437|	SKP2|	http://www.genome.jp/kegg-bin/show_pathway?gga04110
Ubiquitin mediated proteolysis	KEGG PATHWAY	gga04120	1	122	0.694611	ENSGALG00000003547	gga:427437|	|	427437|	SKP2|	http://www.genome.jp/kegg-bin/show_pathway?gga04120
Wnt signaling pathway	KEGG PATHWAY	gga04310	1	123	0.697586	ENSGALG00000012073	gga:420732|	|	420732|	SFRP4|	http://www.genome.jp/kegg-bin/show_pathway?gga04310
RNA transport	KEGG PATHWAY	gga03013	1	128	0.712038	ENSGALG00000015917	gga:373963|	|	373963|	EEF1A1, EEF1A, EF1A|	http://www.genome.jp/kegg-bin/show_pathway?gga03013
Calcium signaling pathway	KEGG PATHWAY	gga04020	1	156	0.781217	ENSGALG00000011258	gga:374244|	|	374244|	ATP2B1|	http://www.genome.jp/kegg-bin/show_pathway?gga04020
Metabolic pathways	KEGG PATHWAY	gga01100	6	987	0.923956	ENSGALG00000006300|ENSGALG00000015640|ENSGALG00000013294|ENSGALG00000008121|ENSGALG00000005069|ENSGALG00000014442	gga:396221|gga:420183|gga:414854|gga:425056|gga:396451|gga:374193|	| | | | | |	396221|420183|414854|425056|396451|374193|	LDHA|RDH10|CYP19A1|CYP17A1, P450-C17, P450c17|PTGS2, CEF147, PGHS2, PHSII|GAPDH, KNC-NDS6|	http://www.genome.jp/kegg-bin/show_pathway?gga01100
